# Supplementary material
Source: PubMed Central journal article supplement (PMC3913261)
Supplement: NIHMS546627-supplement-01.pdf [file NIHMS546627-supplement-01.pdf]

Supplementary Table 1: Hit Profiles

| Compound | ID          | IC50 (nM) | Maximum Inhibition (%) |
|----------|-------------|-----------|------------------------|
| 1        | LDN-0118790 | 38        | 80                     |
| 2        | LDN-0118870 | 74        | 70                     |
| 3        | LDN-0119629 | 37        | 70                     |
| 4        | LDN-0121669 | 100       | 80                     |
| 5        | LDN-0124614 | 306       | 85                     |
| 6        | LDN-0125734 | 15        | 75                     |
| 7        | LDN-0125735 | 139       | 75                     |
| 8        | LDN-0130436 | 174       | 80                     |
| 9        | LDN-0196125 | No fit    | 50                     |
| 10       | LDN-0015257 | 152       | 100                    |
| 11       | LDN-0057218 | 290       | 100                    |
| 12       | LDN-0057325 | 1920      | 100                    |
| 13       | LDN-0066337 | No fit    | 50                     |
| 14       | LDN-0076437 | 1293      | 70                     |
| 15       | LDN-0202779 | 11        | 75                     |
| 16       | LDN-0209285 | 180       | 70                     |

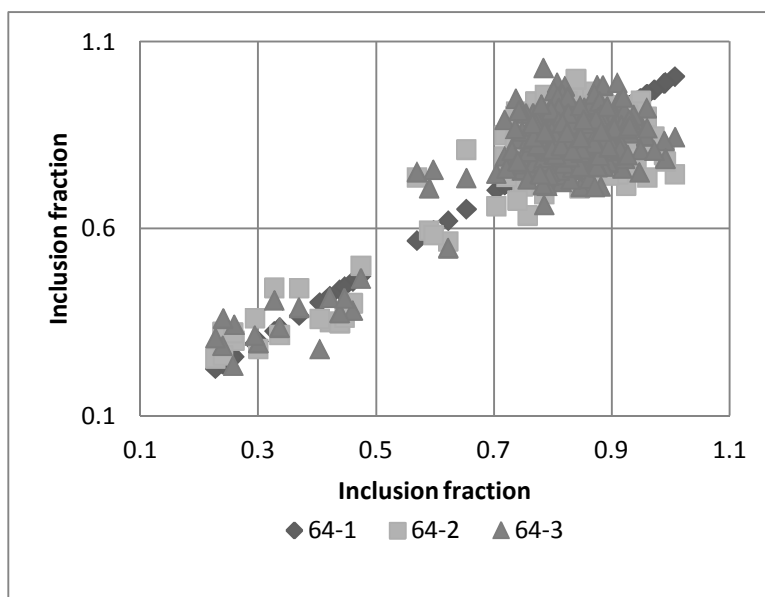

**Supplementary Figure 1: Plotted inclusion fraction against 64-1 in triplicate.** The inclusion fraction was examined in test Plate 64. Values above 0.6 exhibits significant variability, with little correlation among the replicates. In contrast, inclusion fractions below 0.6, values in which we are selecting putative hits, display robust correlation and reproducibility

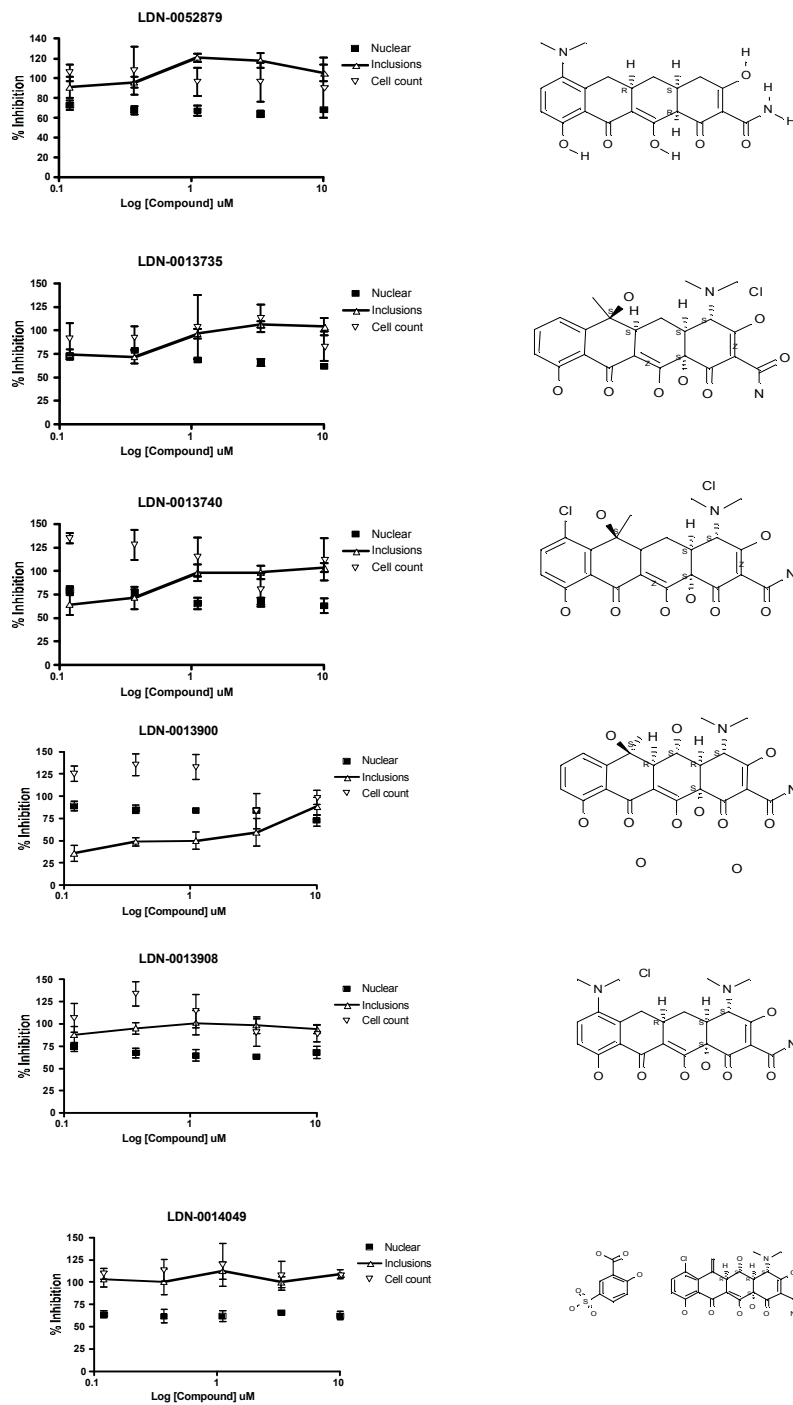

**Supplementary Figure 2: Doxycycline analogues hit in screen.** 5 point dose response confirmation identified doxycycline analogues. Note structural similarity among the analogues. Each structure exhibited dose-dependent increased percent inhibition of the aggregation fraction and reduced total TDP-43::GFP expression. Data represent mean  $\pm$  standard deviation, n = 4.
